# Supplementary material
Source: publisher site journal article supplement (https://www.dovepress.com/get_supplementary_file.php?f=254644.docx)
Supplement: Supplementary file 1 [file get_supplementary_file.php]

**Appendix A**: The World health organization-Uppsala monitoring center causality assessment scale[38]

| Causality term | Assessment criteria |
| --- | --- |
| Certain | Event or laboratory abnormality with plausible time relationship to drug intake Cannot be explained by other drug or disease  Response to withdrawal plausible  Event definitive pharmacologically |
| Probable | Event or laboratory abnormality with plausible time relationship to drug intake Unlikely to attributed to disease or other drugs  Response to withdrawal clinically reasonable |
| Possible | Event or laboratory abnormality with plausible time relationship to drug intakeCould also be explained by disease or other drug Information on drug withdrawal may be lacking or unclear |
| Unlikely | Event or laboratory abnormality with plausible time relationship to drug intake that makes a relationship improbable Disease or other drug provide plausible explanation |

Appendix B:Hartwig’s Severity Assessment Scale[39]

| Level 1 | An ADR occurred but required no change in treatment with the suspected drug. |
| --- | --- |
| Level 2 | The ADR required that treatment with the suspected drug be held, discontinued, or otherwise changed. No antidote or other treatment requirement was required. No increase in length of stay |
| Level 3 | The ADR required that treatment with the suspected drug be held, discontinued, or otherwise changed. And/or An Antidote or other treatment was required. No increase in length of stay |
| Level 4 | Any level 3 ADR which increases length of stay by at least 1 day. Or The ADR was the reason for the admission |
| Level 5 | Any level 4 ADR which requires intensive medical care |
| Level 6 | The adverse reaction caused permanent harm to the patient |
| Level 7 | The adverse reaction either directly or indirectly led to the death of the patient |

Mild= level 1 and 2, moderate= level 3 and 4, severe= 5, 6 and 7, ADR= Adverse drug reaction

1. The use of the WHO-UMC system for standardised case causality assessment. [Last accessed on 2019 July 11]available from [http://www.WHO-UMC.org/graphics/4409.pdf](http://www.who-umc.org/graphics/4409.pdf) .
2. Hartwig SC, Siegel J, Schneider PJ. Preventability and severity assessment in reporting adverse drug reactions. Am J Hosp Pharm. 1992 Sep;49(9):2229-32. PMID: 1524068.
